# Supplementary material
Source: PubMed Central journal article supplement (PMC3386051)
Supplement: 1203823109_pnas.201203823SI.pdf [file 1203823109_pnas.201203823SI.pdf]

# Supporting Information

Park and Han 10.1073/pnas.1203823109

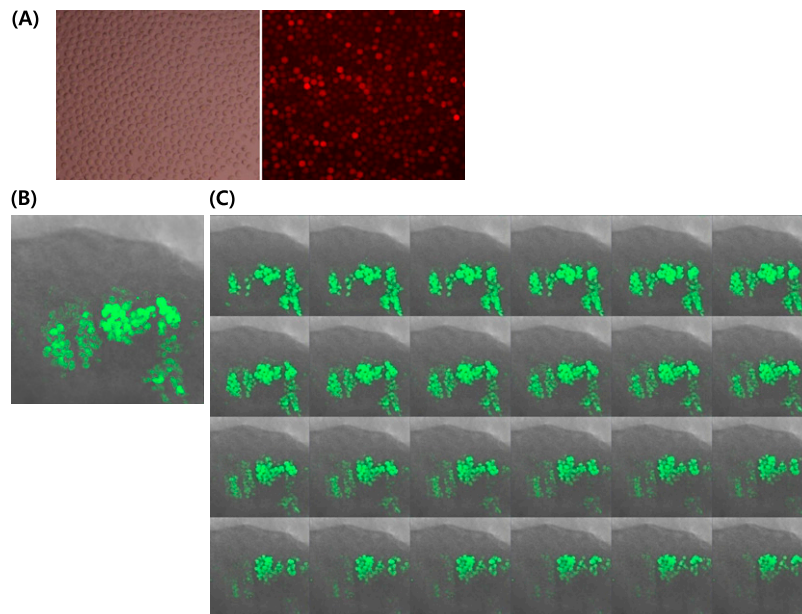

**Fig. S1.** (A) Transfection and G418-selection of SNUhp1 primordial germ-cell (PGC) line with a *piggyBac* CMV-DsRed expression vector (magnification, 200 $\times$ ). (B and C) Detection of GFP-expressing donor PGCs (SNUhp26 line) in testes of hatched germ-line chimera by confocal laser scanning microscope. (B) Merged image of all z-stack sections. (C) Serial z-stack images. (Magnification: 200 $\times$ .) Many GFP<sup>+</sup> donor PGCs are distributed through seminiferous tubules of recipient testes.

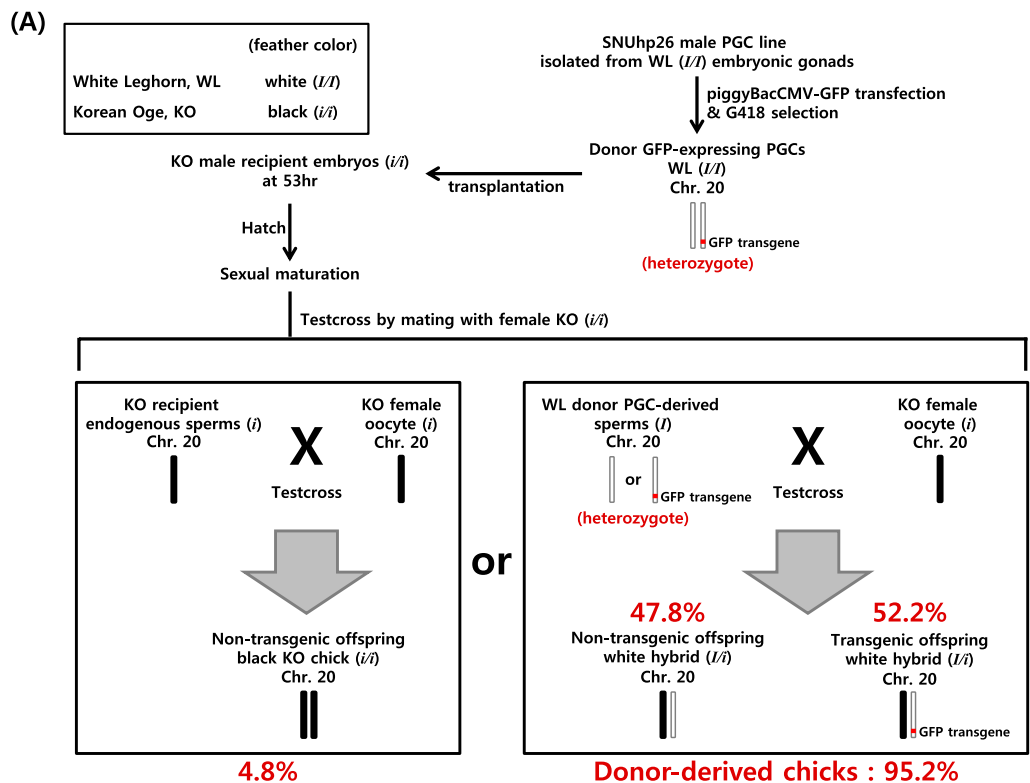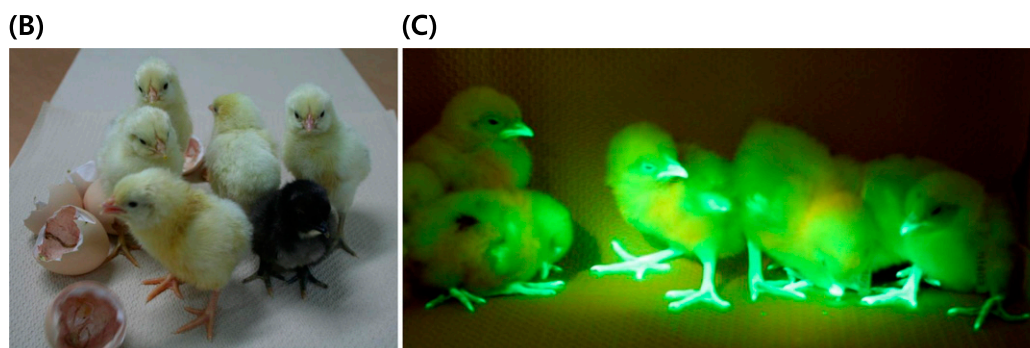

**Fig. S2.** (A) G418-selected and GFP-expressing donor PGCs, in which a single transgene integrated onto the distal end of chromosome 20 were transplanted into recipient embryos. Through test-cross analysis, the germ-line chimeras were identified by the phenotype of their offspring. Endogenous germ cells (sperm) in the recipient male chickens produce only black Korean Oge (KO) because of recessive pigmentation inhibitor gene (*i/i*), whereas White Leghorn (WL) donor-derived germ cells produce the white hybrids with *I/i*. The germ-line chimerism of donor-PGCs was 95.2%, and only 4.8% of progenies were derived from endogenous germ cells. Because GFP-expressing donor PGCs were heterozygous, in which a transgene was inserted into one chromosome 20, half of the donor-derived offspring (52.2%) were transgenic chicks and the other half (47.8%) were nontransgenic chicks derived from donor PGCs. (B) The phenotype of WL (*I/I*) or hybrid (*I/i*) between KO and WL is white, but that of KO (*i/i*) is black. (C) Generation of GFP-expressing transgenic chicks from germ-line chimeric founders through the test-cross. All of the transgenic progenies are strongly expressing GFP and their behavioral activity is energetic.

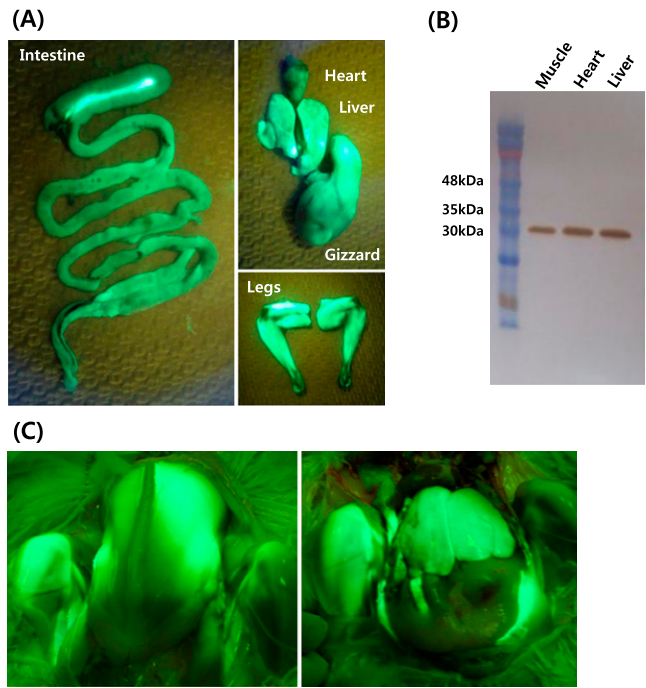

**Fig. S3.** (A) GFP expression in organs of transgenic chicken 7 d after hatch. All organs examined (intestine, heart, liver, and gizzard) in transgenic chickens showed strong GFP expression. (B) Western blotting of GFP in muscle, heart and liver of transgenic chickens. GFP was clearly detected in all tissues. (C) GFP expression of 20-wk-old transgenic chicken.

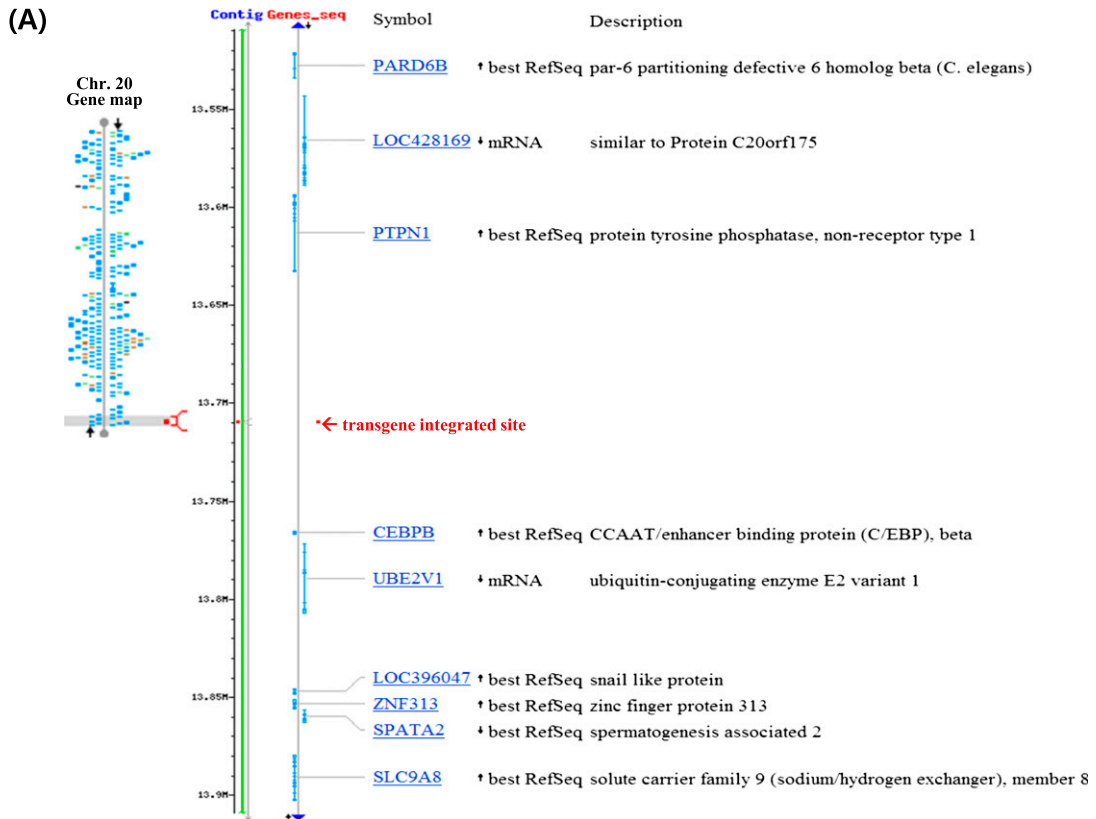

**Fig. 54.** (Continued)

**(B)**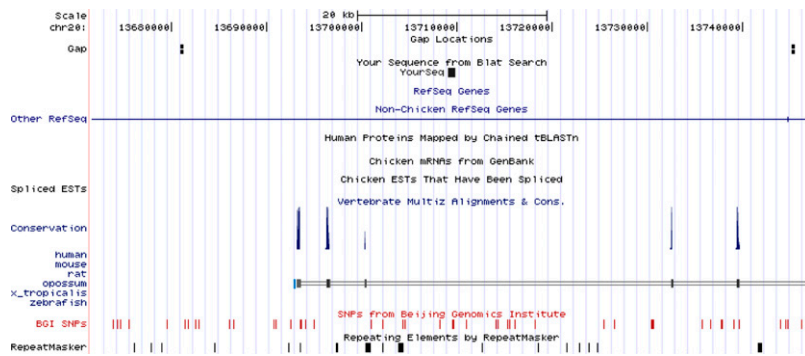**(C)**

```

00000001 ggccacagtgactgocgtagcttgaggcaactgagagctccagtgaaact 00000050
<<<<<<<< <<<<<<<< <<<<<<<< <<<<<<<< <<<<<<<< <<<<<<<<
13709793 ggccacagtgactgocgtagcttgaggcaactgagagctccagtgaaact 13709744

00000051 ccagcaacaatctgggaagaagaagaagaatgcatctattcagttgtgt 00000100
<<<<<<<< <<<<<<<< <<<<<<<< <<<<<<<< <<<<<<<< <<<<<<<<
13709743 ccagcaacaatctgggaagaagaagaagaatgcatctattcagttgtgt 13709694

00000101 attgtgcatctgttcagatctggcagggttaacaggaatgggaagaagag 00000150
<<<<<<<< <<<<<<<< <<<<<<<< <<<<<<<< <<<<<<<< <<<<<<<<
13709693 attgtgcatctgttcagatctggcagggttaacaggaatgggaagaagag 13709644

00000151 ccttaatttcaagttagtgttcccaaacattggcaatctatgactct 00000200
<<<<<<<< <<<<<<<< <<<<<<<< <<<<<<<< <<<<<<<< <<<<<<<<
13709643 ccttaatttcaagttagtgttcccaaacattggcaatctatgactct 13709594

00000201 tggagtgaggcaaatctacatagcaattcgtcagtggttagtctcaaa 00000250
<<<<<<<< <<<<<<<< <<<<<<<< <<<<<<<< <<<<<<<< <<<<<<<<
13709593 tggagtgaggcaaatctacatagcaattcgtcagtggttagtctcaaa 13709544

00000251 ggcagcactctgtgtgagtagcctcatatttgcattgcaaacacagcacta 00000300
<<<<<<<< <<<<<<<< <<<<<<<< <<<<<<<< <<<<<<<< <<<<<<<<
13709543 ggcagcactctgtgtgagtagcctcatatttgcattgcaaacacagcacta 13709494

00000301 ggcagcactctgtgtgagtagcctcatatttgcattgcaaacacagcacta 00000350
<<<<<<<< <<<<<<<< <<<<<<<< <<<<<<<< <<<<<<<< <<<<<<<<
13709493 ggcagcactctgtgtgagtagcctcatatttgcattgcaaacacagcacta 13709444

00000351 atgcagctagtagcacataaattgctgattgactcttatataaagggt 00000400
<<<<<<<< <<<<<<<< <<<<<<<< <<<<<<<< <<<<<<<< <<<<<<<<
13709443 atgcagctagtagcacataaattgctgattgactcttatataaagggt 13709394

00000401 atgcaccaacccttttaattttagatagagatcactgttcaatcaactgag 00000450
<<<<<<<< <<<<<<<< <<<<<<<< <<<<<<<< <<<<<<<< <<<<<<<<
13709393 atgcaccaacccttttaattttagatagagatcactgttcaatcaactgag 13709344

00000451 ctatgctataatctcaactcaagaaaatttggctataacagtagacata 00000500
<<<<<<<< <<<<<<<< <<<<<<<< <<<<<<<< <<<<<<<< <<<<<<<<
13709343 ctatgctataatctcaactcaagaaaatttggctataacagtagacata 13709294

00000501 ggtgtctaaacacttatgtatataactccctgtaaacaggaatattagctg 00000550
<<<<<<<< <<<<<<<< <<<<<<<< <<<<<<<< <<<<<<<< <<<<<<<<
13709293 ggtgtctaaacacttatgtatataactccctgtaaacaggaatattagctg 13709244

00000551 atgtatcacagcatataaaaaacagtaggaagctcaggatttgcattgag 00000600
<<<<<<<< <<<<<<<< <<<<<<<< <<<<<<<< <<<<<<<< <<<<<<<<
13709243 atgtatcacagcatataaaaaacagtaggaagctcaggatttgcattgag 13709194

00000601 ttacatacaaaagtgtgaaaagtatccccattttattttattctttttta 00000650
<<<<<<<< <<<<<<<< <<<<<<<< <<<<<<<< <<<<<<<< <<<<<<<<
13709193 ttacatacaaaagtgtgaaaagtatccccattttattttattctttttta 13709144

00000651 cagtgaattaaagctgaggtacagcacgcatcttctcgtctggaaa 00000700
<<<<<<<< <<<<<<<< <<<<<<<< <<<<<<<< <<<<<<<< <<<<<<<<
13709143 cagtgaattaaagctgaggtacagcacgcatcttctcgtctggaaa 13709094

00000701 acatcttccagttctggtgacagccccatccctccagtcatacacac 00000750
<<<<<<<< <<<<<<<< <<<<<<<< <<<<<<<< <<<<<<<< <<<<<<<<
13709093 acatcttccagttctggtgacagccccatccctccagtcatacacac 13709044

00000751 agattaa 00000757
<<<<<<<< <<<<<<<< <<<<<<<< <<<<<<<< <<<<<<<< <<<<<<<<
13709043 agattaa 13709037

```

**Fig. S4.** (A) Alignment and comparison of the transgene-flanking sequences from DNA walking analysis was conducted using the University of California at Santa Cruz Genome Browser (<http://genome.ucsc.edu>). A *piggyBac* GFP transgene was integrated into chromosome 20 (reverse direction). (B) No functional gene or transcript was observed in the flanking regions from the transgene integration site. This result is consistent with the BLAST Assembled Genome Database (<http://blast.ncbi.nlm.nih.gov>). (C) Alignment of sequences from DNA walking with chicken genomic sequences using UCSC genome browser.

**Table S1. RT-PCR primer sequences and cycle conditions for sexing, germ-cell-, or stem-cell-specific genes**

| Gene         | Sequences                                                             | Annealing temperature (°C) | Cycles |
|--------------|-----------------------------------------------------------------------|----------------------------|--------|
| <i>USP</i>   | F5'-CTATGCCTACCACATTCTATTTGC-3'<br>R5'-AGCTGGACTTCAGACCATCTTCT-3'     | 60                         | 35     |
| <i>CPE15</i> | F5'-AAGCATAGAAAACATGTGGGAC-3'<br>R5'-AACTCTGTGTGGAAGGACTT-3'          |                            |        |
| <i>Qsex</i>  | F5'-CTATGCCTACCACATTCTATTTGC-3'<br>R5'-AGCTGGACTTCAGACCATCTTCT-3'     | 66                         | 35     |
| <i>Vasa</i>  | F5'-GCTCGATATGGGTTTTGGAT-3'<br>R5'-TTCTCTGGGTTCCATTCTGC-3'            | 65                         | 40     |
| <i>Dazl</i>  | F5'-GCT TGC ATG CTT TTC CTG CT-3'<br>R5'-TGC GTC ACA AAG TTA GGC A-3' | 65                         | 35     |
| <i>PouV</i>  | F5'-AAATGTGTGAAGCCAGTCC-3'<br>R5'-TTGTGGAAGGTGGCATGTA-3'              | 65                         | 30     |
| <i>Nanog</i> | F5'-GGTGAGAGTGGACAAGGAA-3'<br>R5'-CCAGATACGAGCTTGATGA-3'              | 60                         | 30     |
| <i>GAPDH</i> | F5'-GGTGGTGCTAAGCGTGTAT-3'<br>R5'-ACCTCTGCCATCTCTCCACA-3'             | 65                         | 30     |
